# Supplementary material for: Bowman’s capsule provides a protective niche for podocytes from cytotoxic CD8+ T cells
Source: JCI journal article supplement (doi:10.1172/jci97879), 2018-07-08
Supplement: sd1 [file 1]

## Supplemental Figure1

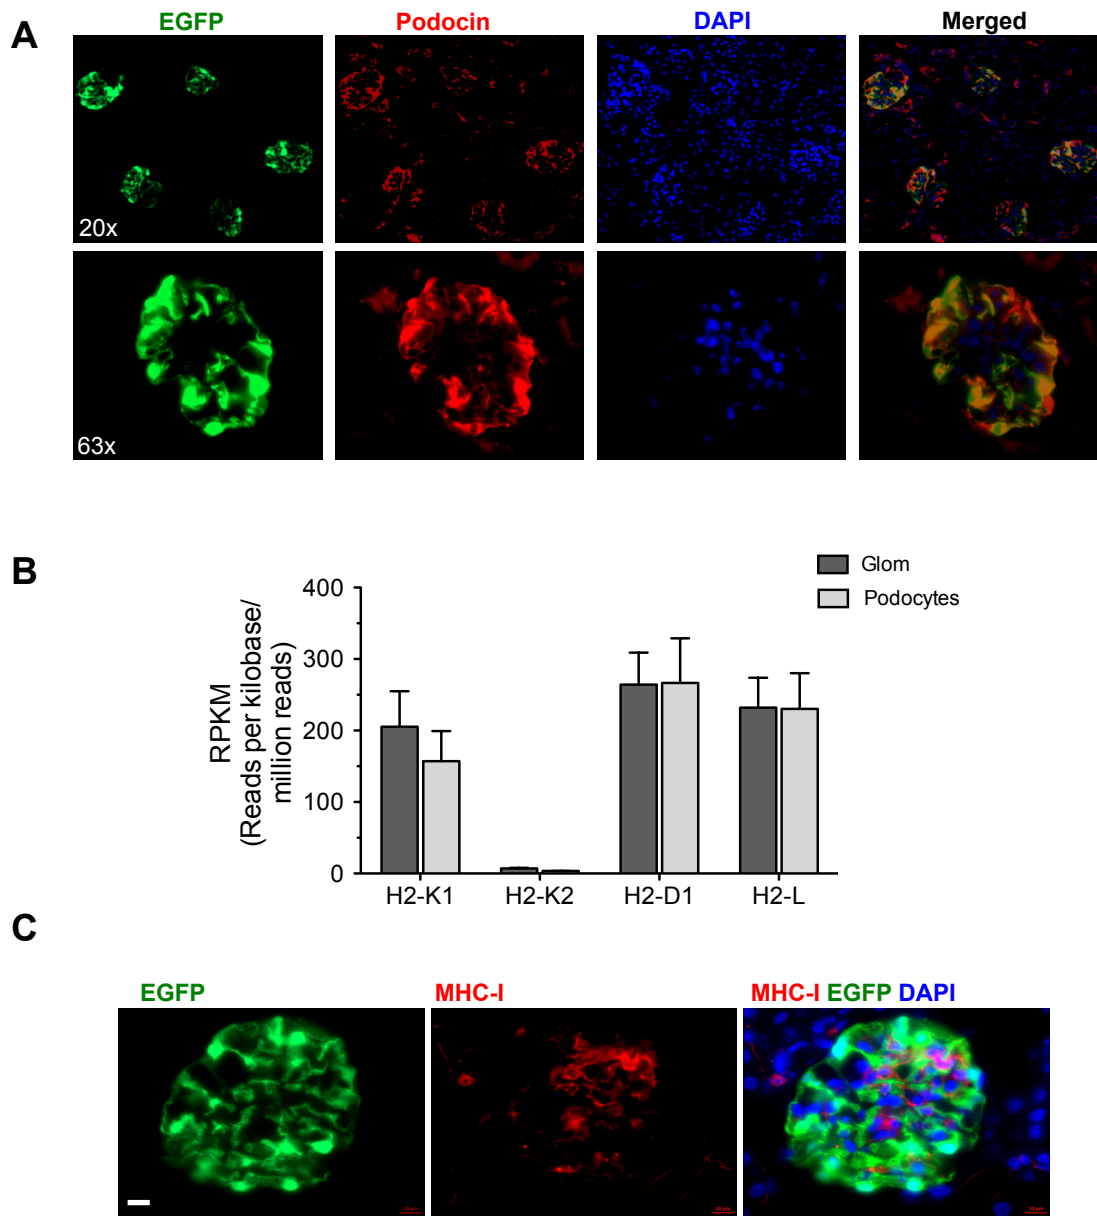

**Suppl. Fig. 1: Podocytes from pod-EGFP transgenic mice show expression of EGFP and MHC-I.** (A) Co-localization of the podocyte marker podocin (red) and EGFP (green) in pod-EGFP transgenic mice. (B) Expression of MHC-I genes in isolated glomeruli (Glom) and in sorted podocytes from pod-EGFP mice by mRNA sequencing. (C) Representative image of MHC-I immunofluorescence in pod-EGFP mouse kidneys. Scale bar: 10µm.

## Supplemental Figure2

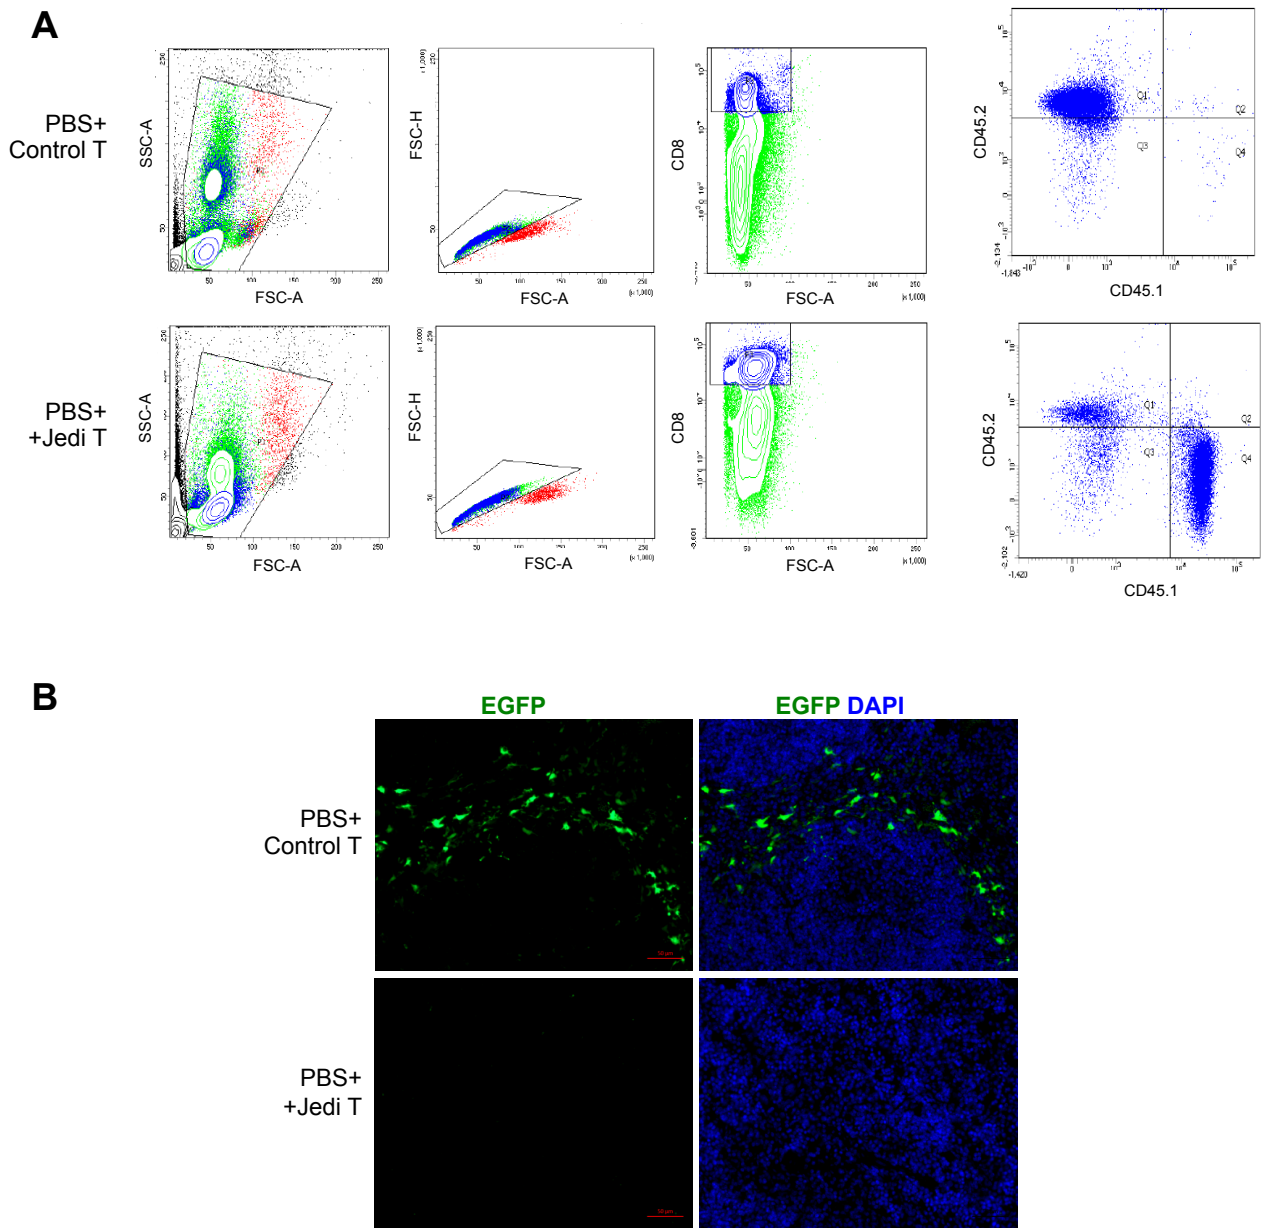

**Suppl. Fig. 2: Jedi T cell injection in pod-EGFP mice.** (A) FACS analysis of peripheral blood after Jedi T cell injection. Jedi T cells are CD45.1+, control T cells are CD45.2+. Recipient pod-EGFP mice are also CD45.2+. In the PBS+control T cell-injected mice, there is only one population of CD45.2+/CD8+ T cells (top panels). In the PBS+Jedi T cell-injected mice, there is an additional population of CD45.1+/CD8+ T cells, indicating the expansion of the Jedi T cells in the recipient mice (bottom panels). (B) Spleen of LV.EGFP+control T cell-injected mice shows EGFP+ splenocytes (top panels). In the spleen of LV.EGFP+Jedi T cell-injected mice, the EGFP+ cells completely eliminated.

## Supplemental Figure 3

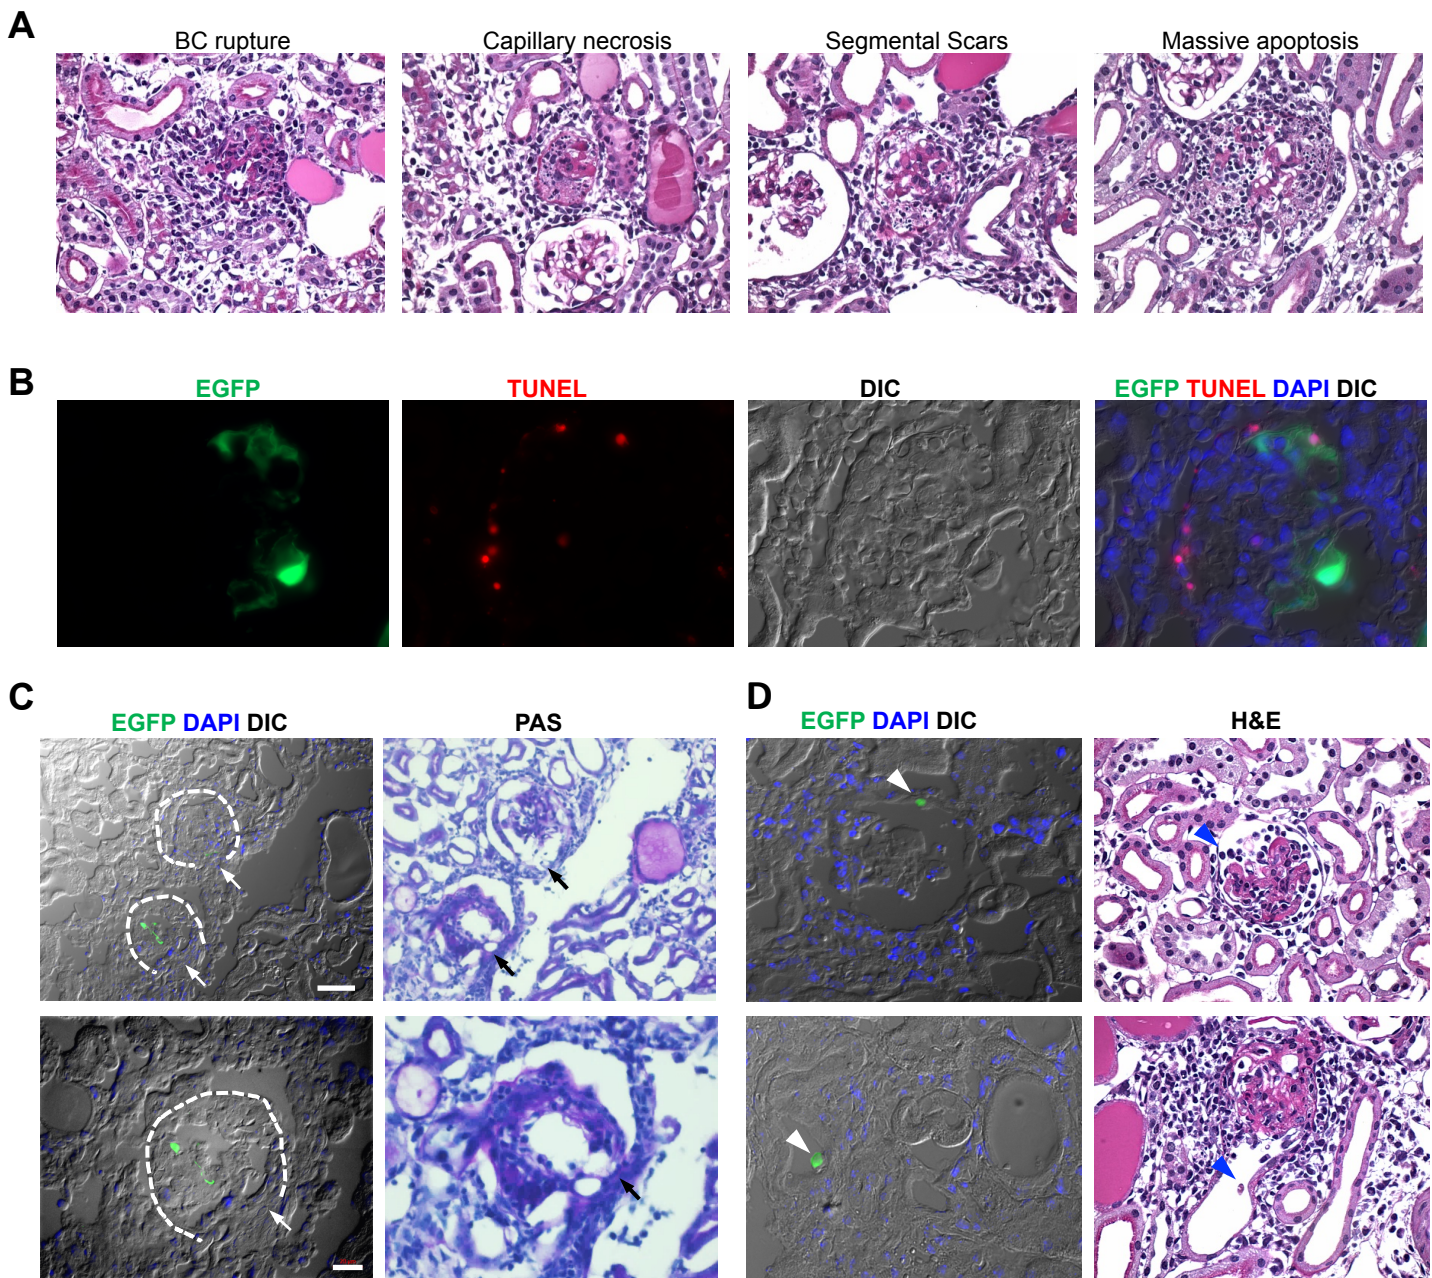

**Suppl Fig. 3** (A) Representative H&E stained section from NTS+EGFPLV+Jedi T cell injected mice showing from left to right: rupture of Bowman capsule, capillary necrosis, segmental scar and massive glomerular apoptosis, as also confirmed by TUNEL stain in (B). (C) Representative immunofluorescence histology with EGFP and DAPI superimposed on a DIC picture and juxtaposed to the PAS stained section. (Upper row: scale bar 50  $\mu$ m and lower row: Scale bars 20  $\mu$ m). Bowman's capsule is indicated by the interrupted line with arrows pointing at rupture of Bowman's capsule, crescent and loss of EGFP+ podocyte area. (D) Same as in part C, except that staining was with H&E. The arrowhead points at a detached EGFP+ podocyte inside Bowman's space (upper row) or inside a tubular lumen (lower row).



## Supplemental Figure 4

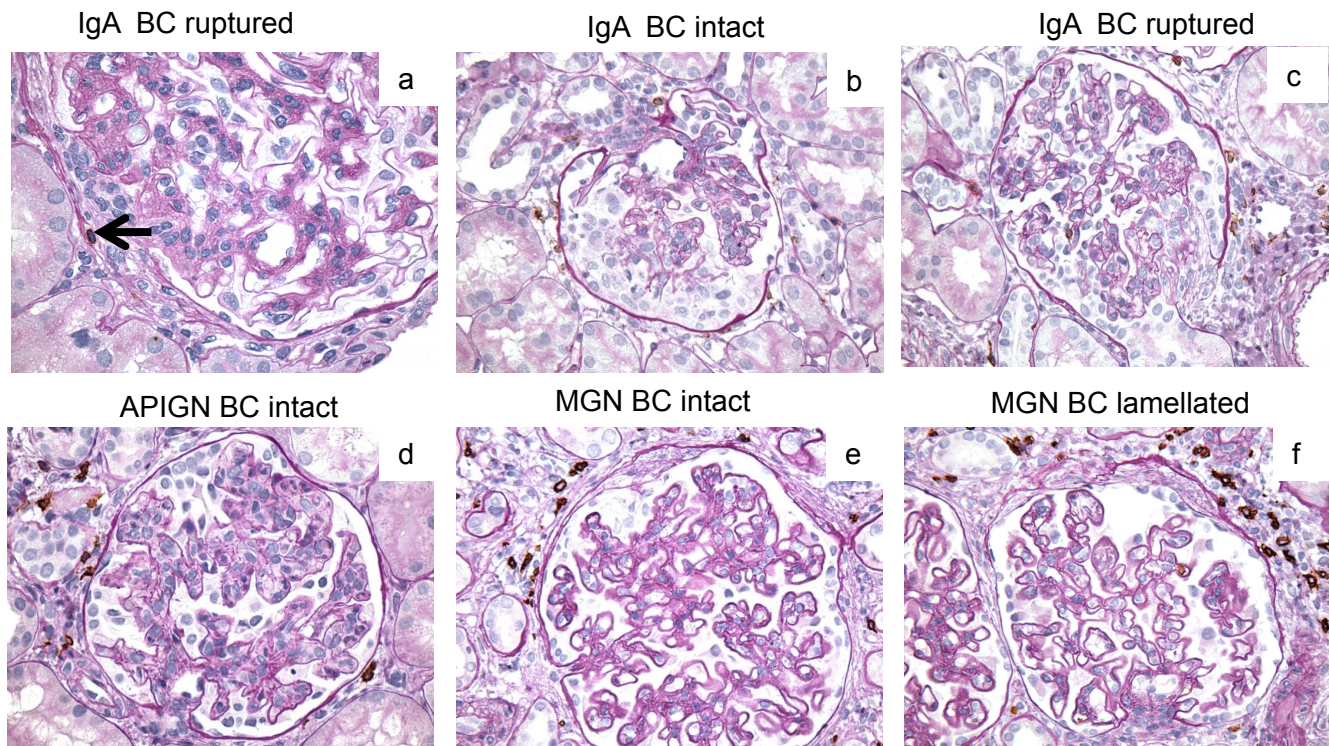

**Suppl Fig. 4 IHC for CD8 in human biopsies with IgA nephropathy (IgA), Acute post-infectious glomerulonephritis (APIGN) and Membranous glomerulopathy (MGN).** A single CD8+ cell (arrow) is seen infiltrating a segmental crescent in an area of ruptured Bowman's capsule in IgA nephropathy (a), (PAS counterstain, original magnification, x600). Other examples of IgA nephropathy have no infiltrating CD8+ cells in cellular crescents with intact Bowman's capsule (b) or segmentally ruptured Bowman's capsule (c), (PAS counterstain, original magnification, x400). No CD8+ cells are identified in a small cellular crescent of APIGN, with intact Bowman's capsule despite scattered CD8+ cells in the adjacent interstitium (d), (PAS counterstain, original magnification, x600). Rare examples of membranous glomerulopathy with small crescent-like subcapsular proliferations show no infiltration by CD8 cells, whether BC is intact (e) or lamellated (f), (PAS counterstain, original magnification, x600).



## Supplemental Table 1

| Section #      | Total # glomeruli | # of ruptured BC | Percentage (%)    |
|----------------|-------------------|------------------|-------------------|
| Mouse 1-1      | 257               | 30               | 11.7              |
| Mouse 1-2      | 267               | 32               | 12.0              |
| Mouse 1-3      | 246               | 32               | 13.0              |
| Mouse 1-4      | 250               | 28               | 11.2              |
| Mouse 1-5      | 283               | 40               | 14.1              |
| Mouse 1-6      | 280               | 39               | 13.9              |
| Mouse 1-7      | 282               | 35               | 12.4              |
| Mouse 1-8      | 264               | 29               | 11.0              |
| Mouse 1-9      | 230               | 34               | 14.8              |
| Mouse 1-10     | 243               | 30               | 12.3              |
| Mouse 1-11     | 272               | 33               | 12.1              |
| Mouse 1-12     | 267               | 42               | 15.7              |
| Mouse 1-13     | 278               | 37               | 13.3              |
| Mouse 1-14     | 280               | 40               | 14.3              |
| Mouse 1-15     | 281               | 40               | 14.2              |
| <b>Mouse 1</b> |                   | <b>mean±SD</b>   | <b>13.07±1.40</b> |
|                |                   |                  |                   |
| Mouse 2-1      | 200               | 42               | 21.0              |
| Mouse 2-2      | 220               | 50               | 22.7              |
| Mouse 2-3      | 226               | 47               | 20.8              |
| Mouse 2-4      | 221               | 44               | 19.9              |
| Mouse 2-5      | 225               | 36               | 16.0              |
| Mouse 2-6      | 214               | 40               | 18.7              |
| Mouse 2-7      | 238               | 45               | 18.9              |
| Mouse 2-8      | 226               | 38               | 16.8              |
| Mouse 2-9      | 228               | 43               | 18.9              |
| Mouse 2-10     | 231               | 45               | 19.5              |
| Mouse 2-11     | 234               | 44               | 18.8              |
| Mouse 2-12     | 245               | 50               | 20.4              |
| Mouse 2-13     | 232               | 45               | 19.4              |
| Mouse 2-14     | 244               | 42               | 17.2              |
| Mouse 2-15     | 240               | 45               | 18.8              |
| <b>Mouse 2</b> |                   | <b>mean±SD</b>   | <b>19.19±1.71</b> |

**Suppl. Table. 1: Quantification of ruptured BC in serial sections of NTS+Jedi T group.** 15 serial sections (in 6µm thickness) of PAS-stained kidneys of two mice from NTS+Jedi T group were scanned and analyzed for % of ruptured BC.

## Supplemental Table 2

|               |   | % of glomeruli with crescents |       | % of glomeruli with <i>ruptured</i> BC and with CD8 cells in the crescents |       | % of glomeruli with <i>intact</i> BC and with CD8 cells in the crescents |      | % of glomeruli with <i>ruptured</i> BC and with <i>no</i> CD8 cells in the crescents |      | % of glomeruli with <i>intact</i> BC and with <i>no</i> CD8 cells in the crescents |       |
|---------------|---|-------------------------------|-------|----------------------------------------------------------------------------|-------|--------------------------------------------------------------------------|------|--------------------------------------------------------------------------------------|------|------------------------------------------------------------------------------------|-------|
|               | N | mean                          | SD    | mean                                                                       | SD    | mean                                                                     | SD   | mean                                                                                 | SD   | mean                                                                               | SD    |
| anti-GBM GN   | 7 | 83.84                         | 8.57  | 53.98                                                                      | 24.88 | 6.50                                                                     | 8.93 | 4.98                                                                                 | 8.04 | 18.38                                                                              | 18.65 |
| ANCA-GN       | 7 | 80.86                         | 19.10 | 59.66                                                                      | 14.87 | 2.88                                                                     | 5.12 | 5.67                                                                                 | 7.46 | 12.65                                                                              | 10.08 |
| IgA nephritis | 6 | 41.93                         | 13.77 | 9.17                                                                       | 8.86  | 4.17                                                                     | 2.74 | 6.99                                                                                 | 7.09 | 21.60                                                                              | 20.95 |
| APIGN         | 5 | 13.87                         | 13.47 | 6.41                                                                       | 8.79  | 2.28                                                                     | 3.42 | 0.00                                                                                 | 0.00 | 5.19                                                                               | 11.59 |
| MGN           | 7 | 2.44                          | 4.51  | 0.00                                                                       | 0.00  | 0.00                                                                     | 0.00 | 0.55                                                                                 | 1.45 | 1.89                                                                               | 3.29  |
